# Supplementary material
Source: Springer Nature journal article supplement (https://www.springermedizin.de/resource/supplementary/13643_2012_79_MOESM1_ESM.pdf/9681530)
Supplement: MOESM1 [file 9681530]

IDENTIFICATION

Number of records identified through database searching = 6731

Number of additional records identified through other sources = 88

Number of records after duplicates removed = 2909

SCREENING

Number of records screened = 86

Number of records excluded = 2810

ELIGIBILITY

Number of full text assessed for eligibility = 86

Number of full text excluded with reasons = 54

INCLUDED

Number of studies retained for the entire review = 32

Number of studies included in this qualitative synthesis = 24
